# Supplementary material for: Systems biology of ovine intestinal parasite resistance: disease gene modules and biomarkers
Source: Royal Society of Chemistry journal article supplement (doi:10.1039/c0mb00190b), 2010-11-11
Supplement: c0mb00190b-12.pdf [file c0mb00190b-12.pdf]

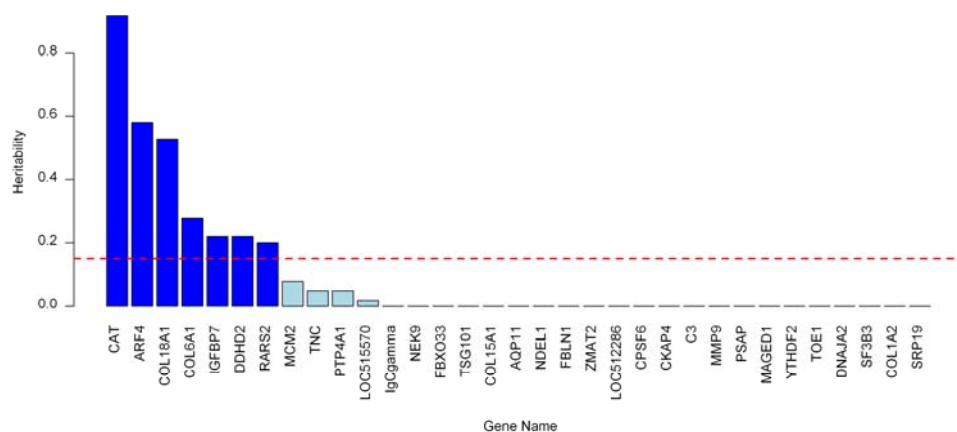

Fig. 1. Heritability of 33 biomarker genes derived from half-sib genetic variances in 10 sire families, estimated by random genetic effect mixed models in ASReml. Biomarkers with heritabilities  $> 0.15$  (red dashed line) are shown in blue and those  $< 0.15$  are shown in pale blue.

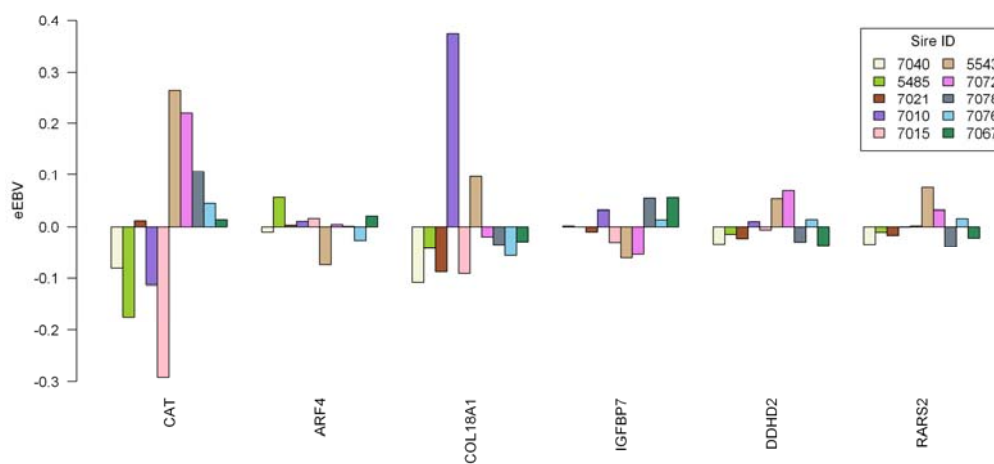

Fig. 2. Expression Estimated breeding values (eEBVs) of sires for the gene expression of 6 biomarkers (heritabilities  $> 0.15$ ) indicating the transmissible levels of transcript abundance to their progeny.
