# Supplementary material for: Systems biology of ovine intestinal parasite resistance: disease gene modules and biomarkers
Source: Royal Society of Chemistry journal article supplement (doi:10.1039/c0mb00190b), 2010-11-11
Supplement: c0mb00190b-13.pdf [file c0mb00190b-13.pdf]

Table S1. Experimental Design showing distribution of e-trait records (microarrays) across days post-infection and three tissues

| Time after infection | Abomasum | Blood            | Gut      |
|----------------------|----------|------------------|----------|
| Day 0                | None (4) | None (8)         | None (4) |
| Day 3                | HC (4)   | HC (4)<br>TC (4) | TC (4)   |
| Day 7                | HC (4)   | HC (4)<br>TC (4) | TC (4)   |
| Day 21               | HC (4)   | HC (4)<br>TC (4) | TC (4)   |

Table S2. Distribution of e-trait records across ten sire groups, tissue types (A: Abomasum; B: Blood, G: Gut) and length of infection (in days) by HC or TC worms

| Sire<br>(no.records) | Tissue<br>type | Records<br>Per<br>tissue | Time of sampling after infection |                  |                  |                  |
|----------------------|----------------|--------------------------|----------------------------------|------------------|------------------|------------------|
|                      |                |                          | 0 days                           | 3 days           | 7 days           | 21 days          |
| 7010 (6)             | G              | 3                        | 1 (none)                         |                  | 1 (TC)           | 1 (TC)           |
|                      | B              | 3                        | 1 (none)                         |                  | 1 (TC)           | 1 (TC)           |
| 7015 (5)             | G              | 2                        | 1 (none)                         |                  |                  | 1 (TC)           |
|                      | B              | 3                        | 1 (none)                         |                  | 1(HC)            | 1 (TC)           |
| 7021 (4)             | A              | 1                        | 1 (none)                         |                  |                  |                  |
|                      | G              | 1                        | 1 (none)                         |                  |                  |                  |
|                      | B              | 2                        | 2 (none)                         |                  |                  |                  |
| 7040 (6)             | A              | 2                        | 1 (none)                         |                  | 1 (HC)           |                  |
|                      | G              | 1                        | 1 (none)                         |                  |                  |                  |
|                      | B              | 3                        | 2 (none)                         |                  | 1 (HC)           |                  |
| 7067 (10)            | A              | 2                        |                                  |                  | 1(HC)            | 1(HC)            |
|                      | G              | 3                        |                                  |                  | 1 (TC)           | 2 (TC)           |
|                      | B              | 5                        |                                  |                  | 1 (HC)<br>1 (TC) | 2 (TC)<br>1 (HC) |
| 7072 (8)             | A              | 2                        |                                  | 1 (HC)           |                  | 1 (HC)           |
|                      | G              | 3                        |                                  | 2 (TC)           | 1 (TC)           |                  |
|                      | B              | 3                        |                                  | 1 (HC)<br>1 (TC) | 1 (TC)           |                  |
| 7076 (1)             | B              | 1                        |                                  | 1 (TC)           |                  |                  |
| 7078 (9)             | A              | 3                        |                                  | 1 (HC)           | 2 (HC)           |                  |
|                      | G              | 2                        |                                  | 1 (TC)           | 1 (TC)           |                  |
|                      | B              | 4                        |                                  | 1 (HC)<br>1 (TC) | 1 (HC)<br>1 (TC) |                  |
| 5485 (6)             | A              | 3                        | 2 (none)                         | 1 (HC)           |                  |                  |
|                      | B              | 3                        | 2 (none)                         | 1 (HC)           |                  |                  |
| 5543 (9)             | A              | 3                        |                                  | 1 (HC)           |                  | 2 (HC)           |
|                      | G              | 1                        |                                  | 1 (TC)           |                  |                  |
|                      | B              | 5                        |                                  | 1 (HC)<br>1 (TC) |                  | 3 (HC)           |
| Total (64)           |                | 64                       | 16                               | 16               | 16               | 16               |
