# Supplementary figures and images for: Systems biology of ovine intestinal parasite resistance: disease gene modules and biomarkers
Source: Royal Society of Chemistry journal article supplement (doi:10.1039/c0mb00190b), 2010-11-11

HCB Cluster Dendrogram

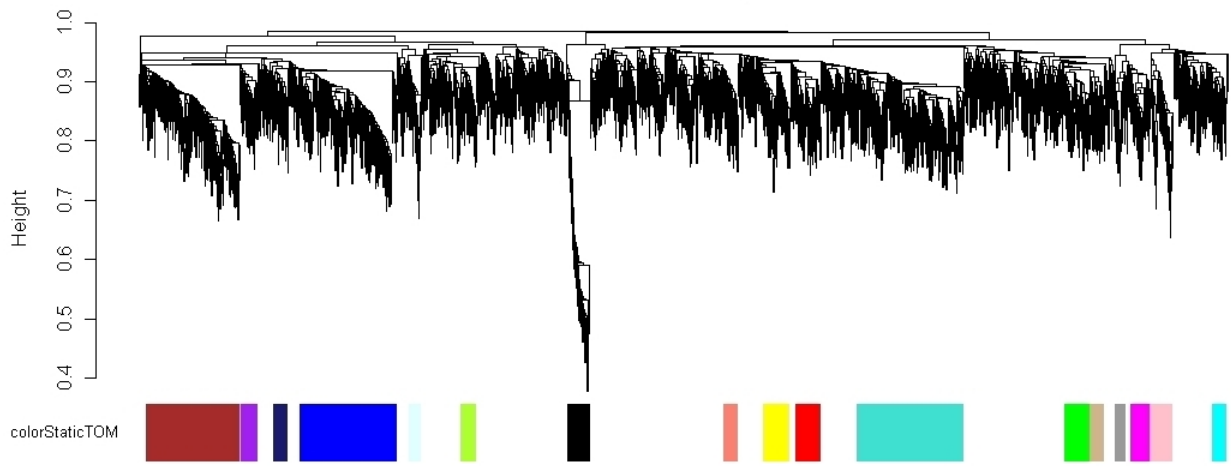

TCB Cluster Dendrogram

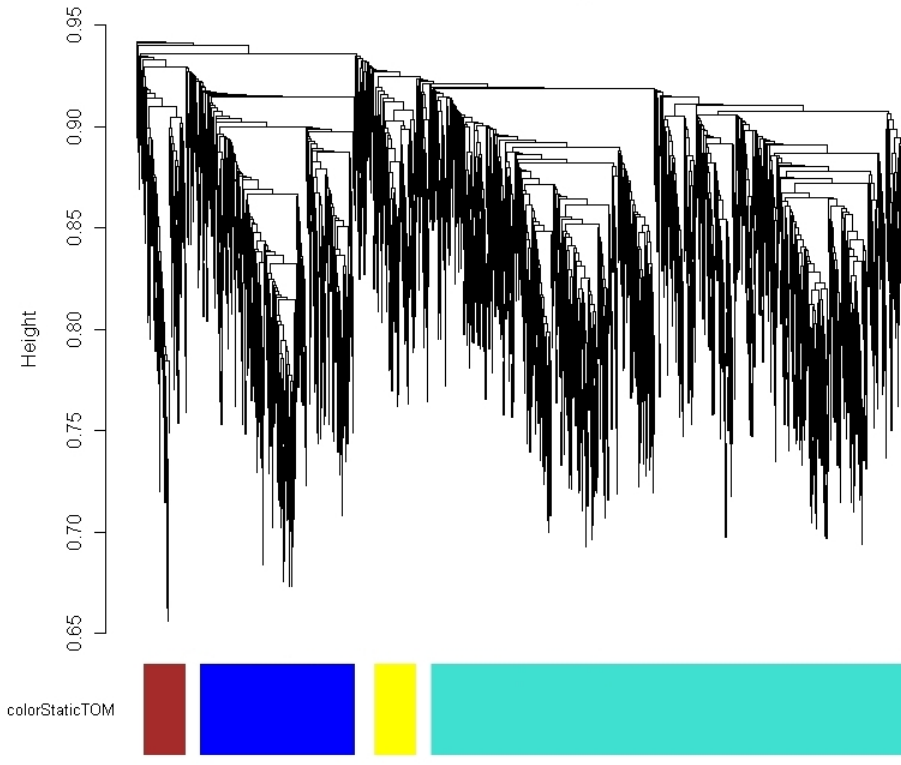

TCG Cluster Dendrogram

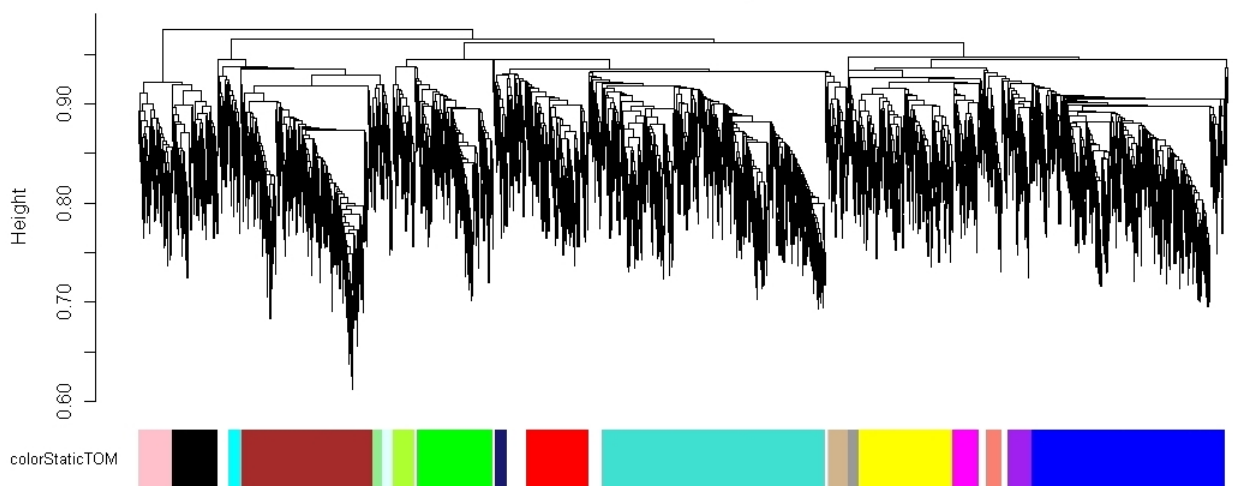

Supplement: c0mb00190b-10.pdf [file c0mb00190b-10.pdf]
